# Supplementary material for: Sequencing of Pooled DNA Samples (Pool-Seq) Uncovers Complex Dynamics of Transposable Element Insertions in Drosophila melanogaster
Source: PLoS Genet. 2012 Jan 26;8(1):e1002487. doi: 10.1371/journal.pgen.1002487 (PMC3266889; doi:10.1371/journal.pgen.1002487)
Supplement: Dataset S4 — The TE composition for the six major chromosome arms of D.melanogaster. The TE composition is provided for families and orders separately. (XLS) [file pgen.1002487.s006.xls]

## Sheet: family
count includes novel and known TE insertions
density is in count/Mbp
whole genome				X				2L				2R				3L				3R				4
length				length				length				length				length				length				length
120381546				22422827				23011544				21146708				24543557				27905053				1351857
TE family	count	density		TE family	count	density		TE family	count	density		TE family	count	density		TE family	count	density		TE family	count	density		TE family	count	density
all	10208	84.7971		all	1638	73.0506		all	1942	84.3924		all	2099	99.2589		all	2105	85.7659		all	1938	69.4498		all	486	359.505
INE-1	2259	18.7653		INE-1	356	15.8767		INE-1	452	19.6423		INE-1	482	22.7931		INE-1	402	16.379		jockey	259	9.28147		INE-1	317	234.492
jockey	1053	8.74719		jockey	215	9.58844		jockey	177	7.69179		jockey	194	9.174		jockey	200	8.14878		INE-1	250	8.95895		1360	33	24.4109
roo	750	6.23019		roo	179	7.98294		roo	110	4.78021		roo	125	5.91109		roo	140	5.70414		roo	195	6.98798		Cr1a	20	14.7945
1360	448	3.7215		Cr1a	64	2.85423		1360	91	3.95454		1360	109	5.15447		1360	100	4.07439		Cr1a	75	2.68769		jockey	8	5.91779
Cr1a	416	3.45568		297	49	2.18527		Cr1a	76	3.30269		Cr1a	89	4.20869		Cr1a	92	3.74844		1360	72	2.58018		Tc1	8	5.91779
297	243	2.01858		1360	43	1.91769		297	51	2.21628		297	42	1.98612		I-element	59	2.40389		F-element	56	2.00681		F-element	8	5.91779
I-element	225	1.86906		hobo	41	1.82849		I-element	50	2.17282		Rt1b	35	1.6551		297	49	1.99645		412	55	1.97097		HB	7	5.17806
F-element	208	1.72784		FB	38	1.6947		F-element	45	1.95554		I-element	35	1.6551		F-element	48	1.95571		hobo	52	1.86346		S-element	5	3.69862
hobo	195	1.61985		I-element	34	1.51631		412	42	1.82517		F-element	32	1.51324		FB	42	1.71124		297	50	1.79179		I-element	5	3.69862
FB	186	1.54509		pogo	32	1.42712		hobo	40	1.73826		flea	30	1.41866		Rt1b	39	1.58901		I-element	42	1.5051		jockey2	4	2.95889
412	181	1.50355		Rt1b	30	1.33792		FB	40	1.73826		412	29	1.37137		hobo	35	1.42604		mdg1	41	1.46927		Tc1-2	4	2.95889
Rt1b	172	1.42879		opus	29	1.29332		Rt1b	34	1.47752		opus	27	1.27679		copia	34	1.38529		pogo	39	1.3976		Fw3	4	2.95889
pogo	151	1.25435		mdg3	29	1.29332		blood	30	1.30369		hobo	27	1.27679		opus	33	1.34455		Doc	39	1.3976		FB	4	2.95889
opus	150	1.24604		Burdock	27	1.20413		Doc	30	1.30369		gypsy8	27	1.27679		pogo	32	1.3038		BS	39	1.3976		pogo	3	2.21917
mdg1	136	1.12974		mdg1	22	0.981143		HMS-Beagle	29	1.26024		diver2	27	1.27679		412	32	1.3038		blood	36	1.29009		mariner2	3	2.21917
Doc	132	1.09651		Doc	22	0.981143		mdg1	27	1.17332		copia	26	1.22951		mdg3	30	1.22232		FB	36	1.29009		invader2	3	2.21917
copia	128	1.06329		412	22	0.981143		opus	24	1.04295		FB	26	1.22951		Quasimodo	29	1.18157		opus	35	1.25425		Quasimodo	3	2.21917
blood	124	1.03006		F-element	19	0.847351		Burdock	22	0.956042		gypsy12	25	1.18222		invader2	25	1.0186		Rt1b	34	1.21842		BS3	3	2.21917
mdg3	124	1.03006		S-element	18	0.802753		pogo	21	0.912585		Stalker4	25	1.18222		HMS-Beagle	25	1.0186		copia	31	1.11091		rooA	2	1.47945
BS	117	0.97191		flea	17	0.758156		copia	21	0.912585		S-element	25	1.18222		Doc	25	1.0186		mdg3	30	1.07507		opus	2	1.47945
Burdock	113	0.938682		copia	16	0.713559		BS	21	0.912585		pogo	24	1.13493		mdg1	24	0.977853		S-element	29	1.03924		gypsy12	2	1.47945
S-element	113	0.938682		invader2	14	0.624364		X-element	19	0.825673		mdg3	23	1.08764		blood	23	0.937109		Burdock	27	0.967567		gypsy11	2	1.47945
HMS-Beagle	105	0.872227		blood	14	0.624364		Tirant	19	0.825673		HMS-Beagle	23	1.08764		BS	23	0.937109		hopper	26	0.931731		Tc3	2	1.47945
Quasimodo	103	0.855613		Quasimodo	14	0.624364		flea	17	0.73876		BS	22	1.04035		X-element	22	0.896366		Rt1a	22	0.788388		Stalker2	2	1.47945
flea	93	0.772544		HMS-Beagle	14	0.624364		S-element	17	0.73876		mdg1	21	0.993062		gypsy8	21	0.855622		Quasimodo	20	0.716716		G4	2	1.47945
invader2	91	0.75593		X-element	12	0.535169		invader1	16	0.695303		blood	21	0.993062		gypsy2	21	0.855622		Max-element	19	0.68088		297	2	1.47945
Rt1a	78	0.64794		gypsy12	11	0.490572		Quasimodo	16	0.695303		Rt1a	21	0.993062		diver2	21	0.855622		invader2	18	0.645044		transib3	1	0.739723
Stalker4	78	0.64794		Tirant	11	0.490572		diver2	15	0.651847		Quasimodo	21	0.993062		Stalker4	21	0.855622		flea	18	0.645044		roo	1	0.739723
diver2	73	0.606405		TART-B	11	0.490572		Max-element	14	0.60839		Burdock	21	0.993062		S-element	19	0.774134		gypsy2	15	0.537537		mdg1	1	0.739723
X-element	72	0.598098		BS	11	0.490572		Idefix	14	0.60839		invader2	18	0.851196		Rt1a	18	0.73339		HMS-Beagle	13	0.465865		invader1	1	0.739723
hopper	70	0.581484		Juan	10	0.445974		invader2	13	0.564934		Max-element	17	0.803908		hopper	16	0.651902		Stalker4	12	0.43003		gypsy9	1	0.739723
gypsy12	69	0.573178		HB	10	0.445974		baggins	13	0.564934		Doc	16	0.756619		Burdock	15	0.611158		Tirant	11	0.394194		gypsy8	1	0.739723
Max-element	66	0.548257		3S18	10	0.445974		mdg3	12	0.521477		invader1	15	0.70933		Tirant	13	0.529671		17.6	11	0.394194		gypsy7	1	0.739723
Tirant	66	0.548257		hopper	8	0.356779		hopper	12	0.521477		gypsy2	15	0.70933		rooA	12	0.488927		gypsy12	10	0.358358		gypsy4	1	0.739723
gypsy2	66	0.548257		17.6	8	0.356779		gypsy8	12	0.521477		Tirant	12	0.567464		invader1	12	0.488927		Transpac	10	0.358358		gypsy2	1	0.739723
gypsy8	63	0.523336		baggins	7	0.312182		Stalker4	12	0.521477		rooA	11	0.520176		gypsy12	11	0.448183		diver	9	0.322522		gtwin	1	0.739723
invader1	57	0.473495		Stalker4	7	0.312182		G2	12	0.521477		17.6	11	0.520176		Max-element	11	0.448183		X-element	9	0.322522		flea	1	0.739723
HB	53	0.440267		Rt1c	7	0.312182		Stalker2	11	0.478021		gypsy5	10	0.472887		Ivk	11	0.448183		TART-B	9	0.322522		X-element	1	0.739723
17.6	47	0.390425		Rt1a	7	0.312182		gypsy12	10	0.434564		diver	10	0.472887		gypsy4	10	0.407439		Stalker2	9	0.322522		Stalker4	1	0.739723
Ivk	42	0.348891		Ivk	7	0.312182		Rt1a	10	0.434564		HB	10	0.472887		flea	10	0.407439		Juan	8	0.286686		Rt1c	1	0.739723
baggins	40	0.332277		invader1	6	0.267584		HB	10	0.434564		GATE	10	0.472887		baggins	10	0.407439		Ivk	8	0.286686		Max-element	1	0.739723
G2	38	0.315663		diver2	6	0.267584		gypsy2	9	0.391108		Doc4-element	10	0.472887		TART-B	10	0.407439		HB	8	0.286686		Idefix	1	0.739723
TART-B	37	0.307356		Idefix	6	0.267584		Ivk	9	0.391108		springer	9	0.425598		G4	10	0.407439		invader1	7	0.250851		HMS-Beagle	1	0.739723
rooA	36	0.299049		G5A	6	0.267584		Tc3	8	0.347652		X-element	9	0.425598		17.6	10	0.407439		G4	7	0.250851		G6	1	0.739723
Juan	35	0.290742		springer	5	0.222987		Doc4-element	8	0.347652		ninja-Dsim-like	8	0.378309		rover	9	0.366695		G2	7	0.250851		G5	1	0.739723
Stalker2	35	0.290742		gypsy2	5	0.222987		transib2	7	0.304195		invader3	8	0.378309		Doc3-element	9	0.366695		3S18	7	0.250851		G3	1	0.739723
3S18	34	0.282435		gypsy	5	0.222987		hopper2	7	0.304195		hopper	8	0.378309		3S18	9	0.366695		gypsy	6	0.215015		Fw2	1	0.739723
Idefix	34	0.282435		Helena	5	0.222987		Tabor	7	0.304195		baggins	8	0.378309		Idefix	8	0.325951		Bari1	6	0.215015		Doc4-element	1	0.739723
G4	33	0.274128		1731	5	0.222987		G5A	7	0.304195		G5A	8	0.378309		HB	8	0.325951		rooA	5	0.179179		Doc3-element	1	0.739723
G5A	33	0.274128		transib2	4	0.17839		G3	7	0.304195		G4	8	0.378309		G2	8	0.325951		invader4	5	0.179179		Dm88	1	0.739723
springer	30	0.249208		mariner2	4	0.17839		17.6	7	0.304195		G2	8	0.378309		Fw3	8	0.325951		invader3	5	0.179179		Burdock	1	0.739723
Dm88	28	0.232594		jockey2	4	0.17839		springer	6	0.260739		Dm88	8	0.378309		transib3	7	0.285207		Tc1-2	5	0.179179		Bari2	1	0.739723
Rt1c	27	0.224287		Max-element	4	0.17839		mariner2	6	0.260739		3S18	8	0.378309		springer	7	0.285207		G5A	5	0.179179		BS	1	0.739723
Doc4-element	26	0.21598		transib4	3	0.133792		invader4	6	0.260739		Tabor	7	0.331021		G5A	7	0.285207		transib2	4	0.143343		412	1	0.739723
Fw3	25	0.207673		invader3	3	0.133792		S2	6	0.260739		Juan	7	0.331021		Doc4-element	7	0.285207		diver2	4	0.143343
diver	25	0.207673		gypsy5	3	0.133792		G5	6	0.260739		Ivk	7	0.331021		jockey2	6	0.244463		G5	4	0.143343
invader3	25	0.207673		Tc1	3	0.133792		Dm88	6	0.260739		Fw3	7	0.331021		hopper2	6	0.244463		Dm88	4	0.143343
jockey2	25	0.207673		TART-A	3	0.133792		Rt1c	5	0.217282		gypsy9	6	0.283732		gypsy6	6	0.244463		springer	3	0.107507
Tabor	24	0.199366		Stalker2	3	0.133792		Juan	5	0.217282		gtwin	6	0.283732		Tc1	6	0.244463		rover	3	0.107507
Tc1	24	0.199366		G3	3	0.133792		G4	5	0.217282		accord2	6	0.283732		TART-A	6	0.244463		micropia	3	0.107507
gypsy5	24	0.199366		G2	3	0.133792		Fw3	5	0.217282		Tc1-2	6	0.283732		Rt1c	6	0.244463		jockey2	3	0.107507
transib2	24	0.199366		Dm88	3	0.133792		Bari1	5	0.217282		Stalker2	6	0.283732		Dm88	6	0.244463		gypsy5	3	0.107507
G3	23	0.191059		rooA	2	0.0891948		rooA	4	0.173826		Rt1c	6	0.283732		BS3	6	0.244463		Tc3	3	0.107507
gypsy	23	0.191059		micropia	2	0.0891948		invader5	4	0.173826		Fw2	6	0.283732		ninja-Dsim-like	5	0.203719		Tabor	3	0.107507
hopper2	22	0.182752		hopper2	2	0.0891948		invader3	4	0.173826		transib4	5	0.236443		invader3	5	0.203719		R1-element	3	0.107507
Doc3-element	21	0.174445		gypsy8	2	0.0891948		gypsy6	4	0.173826		transib2	5	0.236443		gypsy5	5	0.203719		Helena	3	0.107507
Tc1-2	21	0.174445		ZAM	2	0.0891948		diver	4	0.173826		micropia	5	0.236443		gypsy11	5	0.203719		G6	3	0.107507
Tc3	21	0.174445		Transpac	2	0.0891948		Transpac	4	0.173826		jockey2	5	0.236443		gypsy	5	0.203719		G3	3	0.107507
Transpac	20	0.166138		Tom1	2	0.0891948		R1-element	4	0.173826		invader4	5	0.236443		Tabor	5	0.203719		G-element	3	0.107507
gypsy4	20	0.166138		Tc3	2	0.0891948		Porto1	4	0.173826		hopper2	5	0.236443		Juan	5	0.203719		Doc3-element	3	0.107507
invader4	20	0.166138		Tc1-2	2	0.0891948		G6	4	0.173826		TART-B	5	0.236443		transib2	4	0.162976		BS3	3	0.107507
mariner2	20	0.166138		Tabor	2	0.0891948		Circe	4	0.173826		G3	5	0.236443		Transpac	4	0.162976		transib3	2	0.0716716
G5	19	0.157832		Stalker	2	0.0891948		transib4	3	0.130369		G-element	5	0.236443		Stalker2	4	0.162976		hopper2	2	0.0716716
rover	19	0.157832		S2	2	0.0891948		rover	3	0.130369		Doc3-element	5	0.236443		Stalker	4	0.162976		baggins	2	0.0716716
BS3	18	0.149525		G-element	2	0.0891948		ninja-Dsim-like	3	0.130369		Doc2-element	5	0.236443		S2	4	0.162976		Tc1	2	0.0716716
ninja-Dsim-like	17	0.141218		Bari1	2	0.0891948		jockey2	3	0.130369		mariner2	4	0.189155		R1-element	4	0.162976		TART-A	2	0.0716716
Bari1	16	0.132911		transib3	1	0.0445974		gypsy5	3	0.130369		gypsy6	4	0.189155		Porto1	4	0.162976		S2	2	0.0716716
G-element	16	0.132911		transib1	1	0.0445974		gypsy4	3	0.130369		gypsy4	4	0.189155		GATE	4	0.162976		Rt1c	2	0.0716716
R1-element	16	0.132911		rover	1	0.0445974		gypsy	3	0.130369		gypsy11	4	0.189155		G3	4	0.162976		Bari2	2	0.0716716
GATE	15	0.124604		ninja-Dsim-like	1	0.0445974		McClintock	3	0.130369		gypsy	4	0.189155		Fw2	4	0.162976		transib1	1	0.0358358
S2	15	0.124604		invader5	1	0.0445974		G-element	3	0.130369		Tc1	4	0.189155		mariner2	3	0.122232		looper1	1	0.0358358
gypsy6	15	0.124604		invader4	1	0.0445974		BS3	3	0.130369		R1-element	4	0.189155		invader5	3	0.122232		invader6	1	0.0358358
Fw2	14	0.116297		gypsy7	1	0.0445974		micropia	2	0.0869129		Porto1	4	0.189155		invader4	3	0.122232		gypsy4	1	0.0358358
gtwin	14	0.116297		gypsy6	1	0.0445974		gtwin	2	0.0869129		Idefix	4	0.189155		gtwin	3	0.122232		gtwin	1	0.0358358
Porto1	13	0.10799		gypsy4	1	0.0445974		accord2	2	0.0869129		G5	4	0.189155		Tc3	3	0.122232		Stalker	1	0.0358358
micropia	13	0.10799		gypsy3	1	0.0445974		Tc1-2	2	0.0869129		Circe	4	0.189155		G5	3	0.122232		Porto1	1	0.0358358
transib3	13	0.10799		gtwin	1	0.0445974		TART-B	2	0.0869129		rover	3	0.141866		G-element	3	0.122232		Idefix	1	0.0358358
transib4	13	0.10799		accord2	1	0.0445974		Fw2	2	0.0869129		gypsy10	3	0.141866		transib4	2	0.0814878		Fw2	1	0.0358358
TART-A	12	0.0996831		R1-element	1	0.0445974		Doc3-element	2	0.0869129		Tc3	3	0.141866		gypsy9	2	0.0814878		Circe	1	0.0358358
gypsy11	12	0.0996831		Q-element	1	0.0445974		Bari2	2	0.0869129		G7	3	0.141866		gypsy10	2	0.0814878		BS4	1	0.0358358
Circe	11	0.0913761		McClintock	1	0.0445974		transib3	1	0.0434564		gypsy3	2	0.0945774		diver	2	0.0814878		1731	1	0.0358358
G6	11	0.0913761		G7	1	0.0445974		transib1	1	0.0434564		accord	2	0.0945774		ZAM	2	0.0814878
Helena	11	0.0913761		G5	1	0.0445974		gypsy9	1	0.0434564		Tom1	2	0.0945774		Tc1-2	2	0.0814878
1731	10	0.0830692		G4	1	0.0445974		gypsy3	1	0.0434564		R1-2	2	0.0945774		McClintock	2	0.0814878
gypsy9	10	0.0830692		Fw3	1	0.0445974		gypsy11	1	0.0434564		NOF	2	0.0945774		Helena	2	0.0814878
accord2	9	0.0747623		Doc3-element	1	0.0445974		frogger	1	0.0434564		McClintock	2	0.0945774		HeT-A	2	0.0814878
McClintock	8	0.0664554		Circe	1	0.0445974		accord	1	0.0434564		G6	2	0.0945774		Bari1	2	0.0814878
invader5	8	0.0664554		Bari2	1	0.0445974		Tc1	1	0.0434564		BS3	2	0.0945774		transib1	1	0.0407439
Bari2	7	0.0581484		BS3	1	0.0445974		Q-element	1	0.0434564		1731	2	0.0945774		micropia	1	0.0407439
Stalker	7	0.0581484						GATE	1	0.0434564		transib3	1	0.0472887		looper1	1	0.0407439
Doc2-element	6	0.0498415						Doc2-element	1	0.0434564		transib1	1	0.0472887		gypsy7	1	0.0407439
Tom1	5	0.0415346						1731	1	0.0434564		invader6	1	0.0472887		aurora-element	1	0.0407439
ZAM	5	0.0415346										gypsy7	1	0.0472887		Tom1	1	0.0407439
gypsy10	5	0.0415346										ZAM	1	0.0472887		G6	1	0.0407439
transib1	5	0.0415346										TART-A	1	0.0472887		Circe	1	0.0407439
G7	4	0.0332277										S2	1	0.0472887		1731	1	0.0407439
gypsy3	4	0.0332277										Q-element	1	0.0472887
gypsy7	4	0.0332277										Helena	1	0.0472887
Q-element	3	0.0249208										Bari2	1	0.0472887
accord	3	0.0249208										Bari1	1	0.0472887
HeT-A	2	0.0166138
NOF	2	0.0166138
R1-2	2	0.0166138
invader6	2	0.0166138
looper1	2	0.0166138
BS4	1	0.00830692
aurora-element	1	0.00830692
frogger	1	0.00830692

## Sheet: order
whole genome				X				2L				2R				3L				3R				4
length				length				length				length				length				length				length
120381546				22422827				23011544				21146708				24543557				27905053				1351857
TE family	count	density		TE family	count	density		TE family	count	density		TE family	count	density		TE family	count	density		TE family	count	density		TE family	count	density
all	10208	84.7971		all	1638	73.0506		all	1942	84.3924		all	2099	99.2589		all	2105	85.7659		all	1938	69.4498		all	486	359.505
LTR	3487	28.9662		LTR	574	25.5989		TIR	686	29.8111		LTR	761	35.9867		LTR	743	30.2727		LTR	740	26.5185		TIR	384	284.054
TIR	3479	28.8998		TIR	533	23.7704		LTR	634	27.5514		TIR	723	34.1897		TIR	649	26.4428		non-LTR	645	23.1141		non-LTR	63	46.6026
non-LTR	2975	24.7131		non-LTR	476	21.2284		non-LTR	571	24.8136		non-LTR	574	27.1437		non-LTR	646	26.3206		TIR	504	18.0612		LTR	35	25.8903
foldback	186	1.54509		foldback	38	1.6947		foldback	40	1.73826		foldback	26	1.22951		foldback	42	1.71124		foldback	36	1.29009		foldback	4	2.95889
TART	49	0.407039		TART	14	0.624364		S2	6	0.260739		ninja	8	0.378309		TART	16	0.651902		TART	11	0.394194
ninja	17	0.141218		S2	2	0.0891948		ninja	3	0.130369		TART	6	0.283732		ninja	5	0.203719		S2	2	0.0716716
S2	15	0.124604		ninja	1	0.0445974		TART	2	0.0869129		S2	1	0.0472887		S2	4	0.162976
