# Supplementary material for: Sequencing of Pooled DNA Samples (Pool-Seq) Uncovers Complex Dynamics of Transposable Element Insertions in Drosophila melanogaster
Source: PLoS Genet. 2012 Jan 26;8(1):e1002487. doi: 10.1371/journal.pgen.1002487 (PMC3266889; doi:10.1371/journal.pgen.1002487)
Supplement: Dataset S6 — Population frequencies for TE insertions showing evidence for horizontal gene transfer. (XLS) [file pgen.1002487.s008.xls]

## Sheet: data
horizontal gene transfer; comparisions D.melanogaster with D.simulans and D.melanogaster with D.yakuba
family	horizontal gene transfer (yes/no)	count	popfreq
297	y	168	0.248
412	y	161	0.096
1731	n	10	0.81
3S18	y	31	0.329
accord2	n	3	1
Blood	n	111	0.043
Burdock	y	99	0.082
Circe	n	4	1
copia	y	90	0.183
diver	n	23	0.065
diver2	y	43	0.677
flea	y	77	0.24
gtwin	n	7	0.971
Gypsy	n	13	0.754
Gypsy10	y	5	0.88
Gypsy2	y	50	0.314
Gypsy4	n	14	0.914
Gypsy5	y	5	0.383
Gypsy6	y	7	0.886
HMS-Beagle	y	76	0.311
Idefix	n	18	0.622
Invader1	n	37	0.381
Invader2	n	37	0.273
Invader4	n	8	0.375
Invader6	y	2	0.5
Max	y	43	0.326
McClintock	n	5	0.4
mdg1	y	116	0.138
mdg3	y	103	0.074
Micropia	y	11	0.582
opus	n	126	0.117
rooA	n	21	0.805
springer	y	19	0.463
Stalker	n	3	0.4
Stalker2	y	23	0.165
Stalker4	n	33	0.297
Tabor	y	19	0.084
Tirant	n	65	0.068
Transpac	y	18	0.039
baggins1	n	13	0.885
BS3	n	10	0.96
Cr1a	n	261	0.439
Doc	y	93	0.175
Doc2	n	6	0.9
Doc3	n	16	0.85
F-element	n	156	0.169
G2	n	34	0.3
Helena	n	9	0.933
I-element	n	145	0.124
Ivk	n	38	0.2
jockey	y	959	0.083
R1	n	11	0.709
Rt1b	n	132	0.231
X-element	n	63	0.624
1360	n	259	0.554
Bari1	y	15	0.207
Mariner	n	16	0.95
Tc1	n	22	0.982
Tc1-2	n	17	0.959

## Sheet: R
> wilcox.test(htv,nonht)
	Wilcoxon rank sum test with continuity correction
data: htv and nonht
W = 234, p-value = 0.004204
alternative hypothesis: true location shift is not equal to 0
