# Supplementary material for: Sequencing of Pooled DNA Samples (Pool-Seq) Uncovers Complex Dynamics of Transposable Element Insertions in Drosophila melanogaster
Source: PubMed Central journal article supplement (PMC3266889; doi:10.1371/journal.pgen.1002487), 2012-01-26

2L

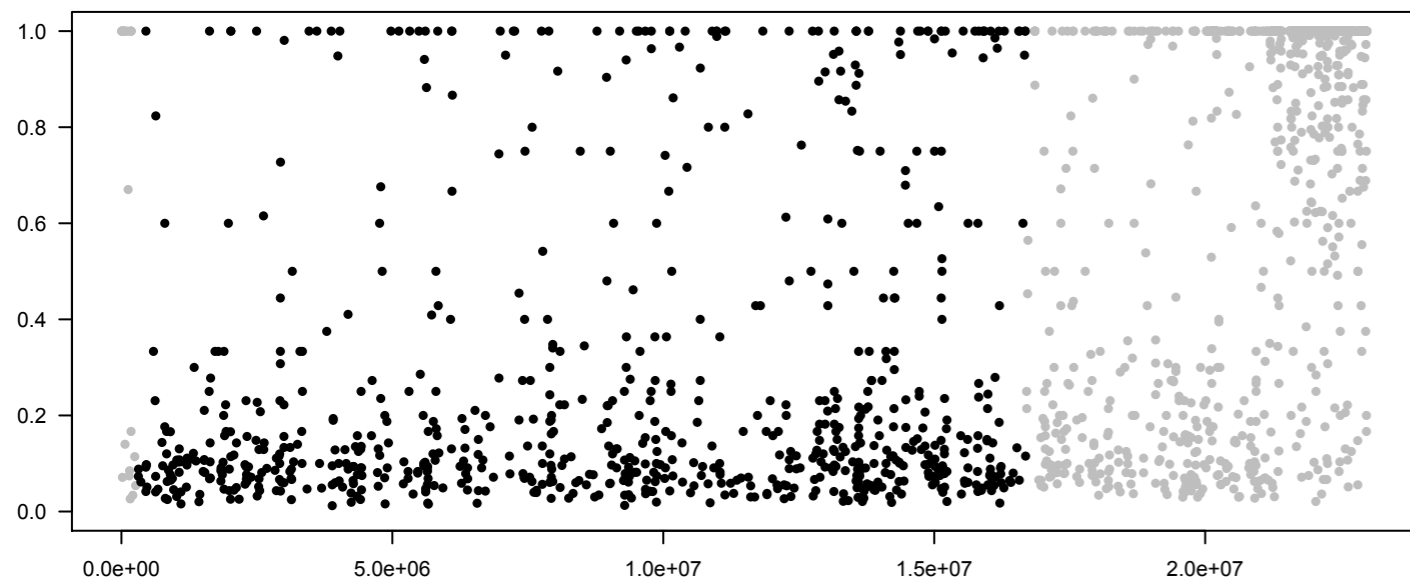

2R

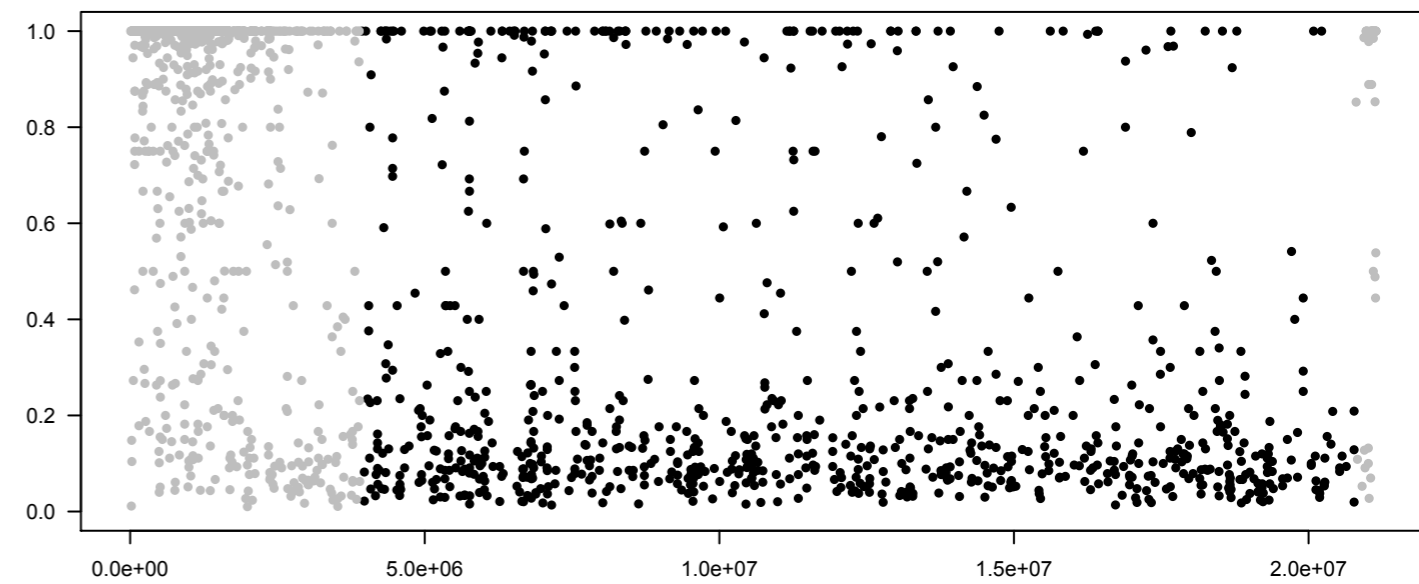

3L

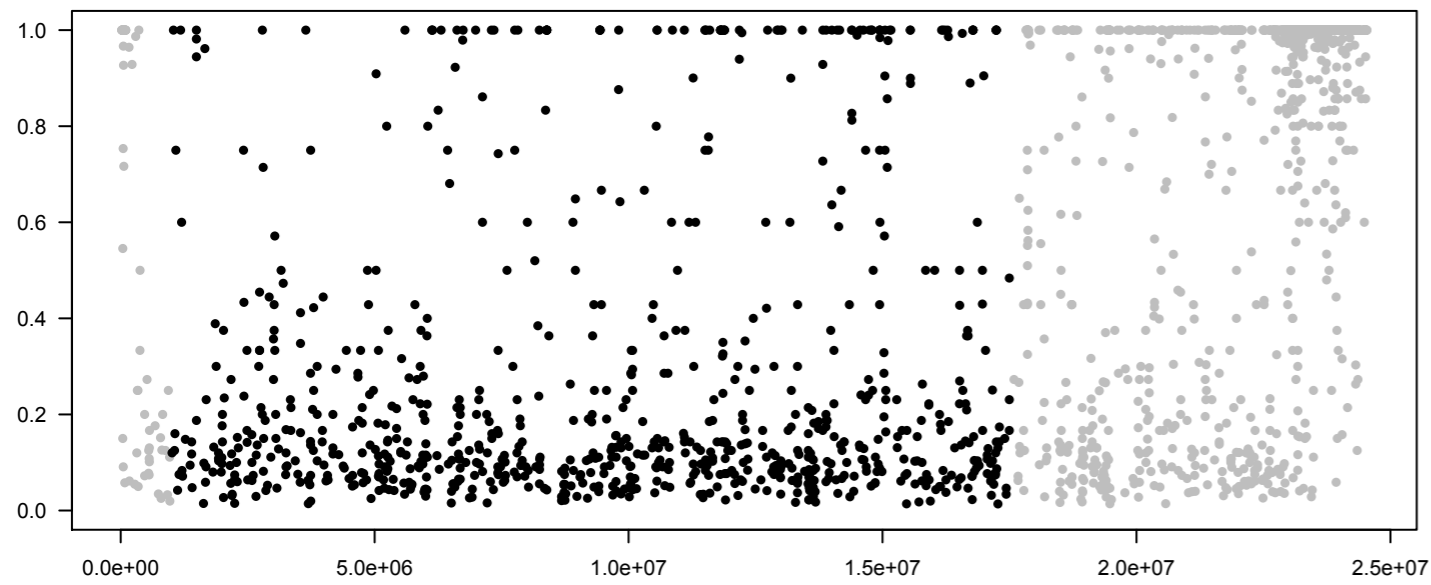

3R

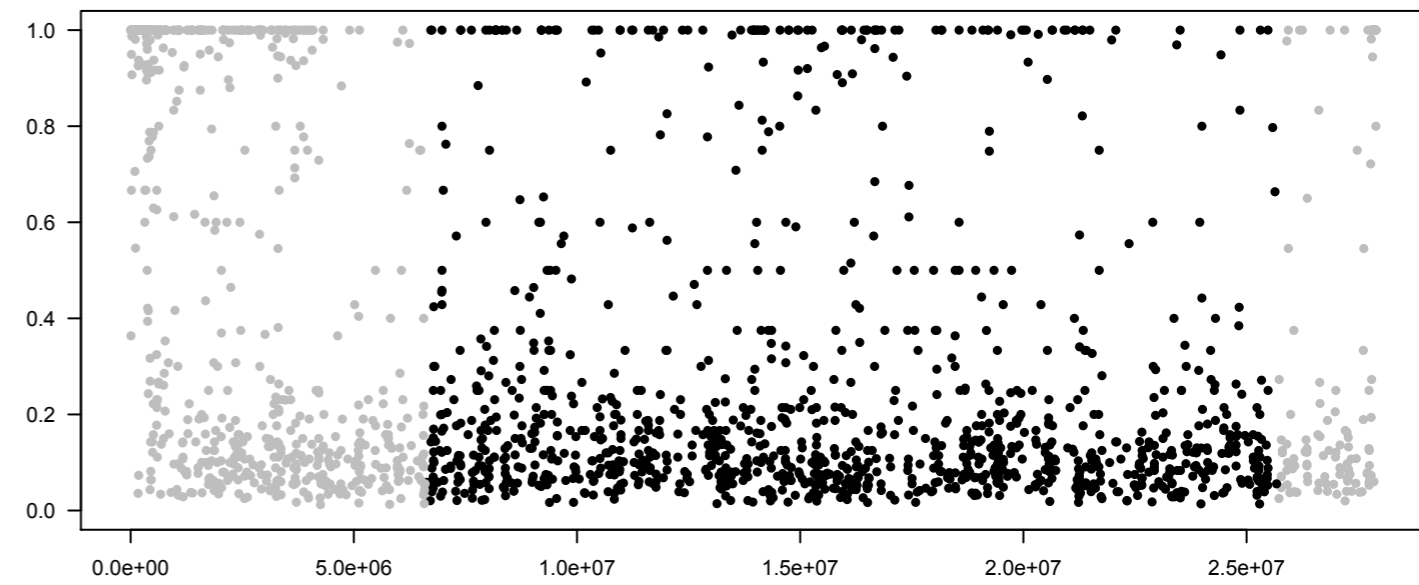

X

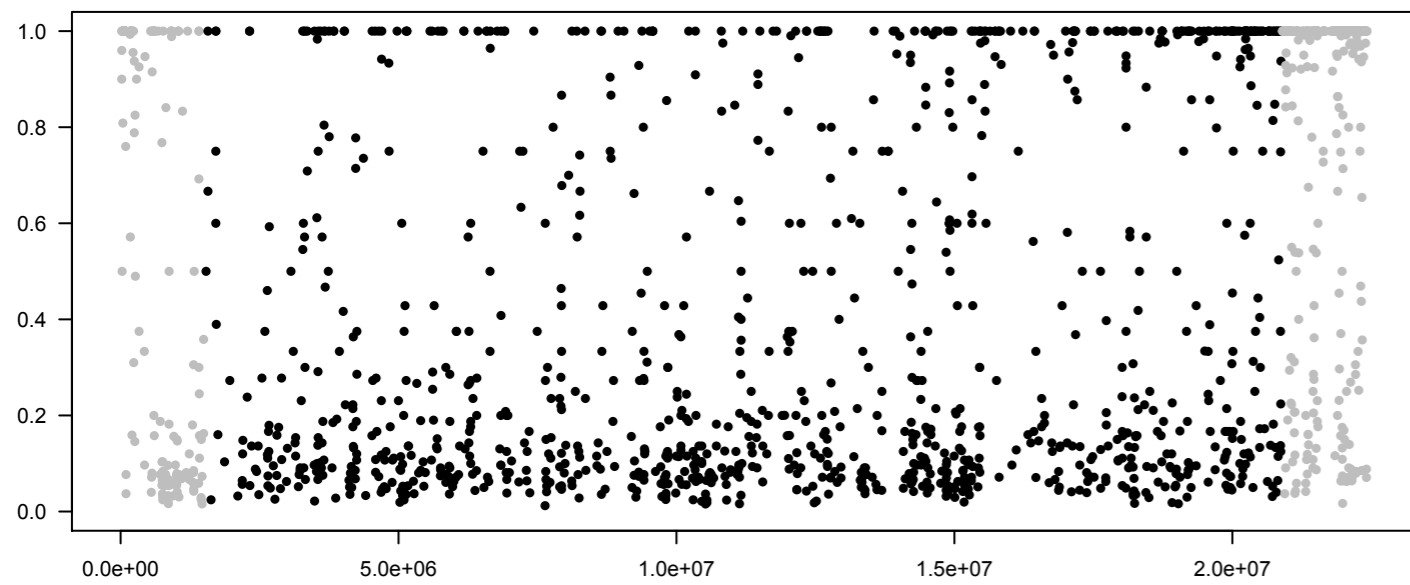

4

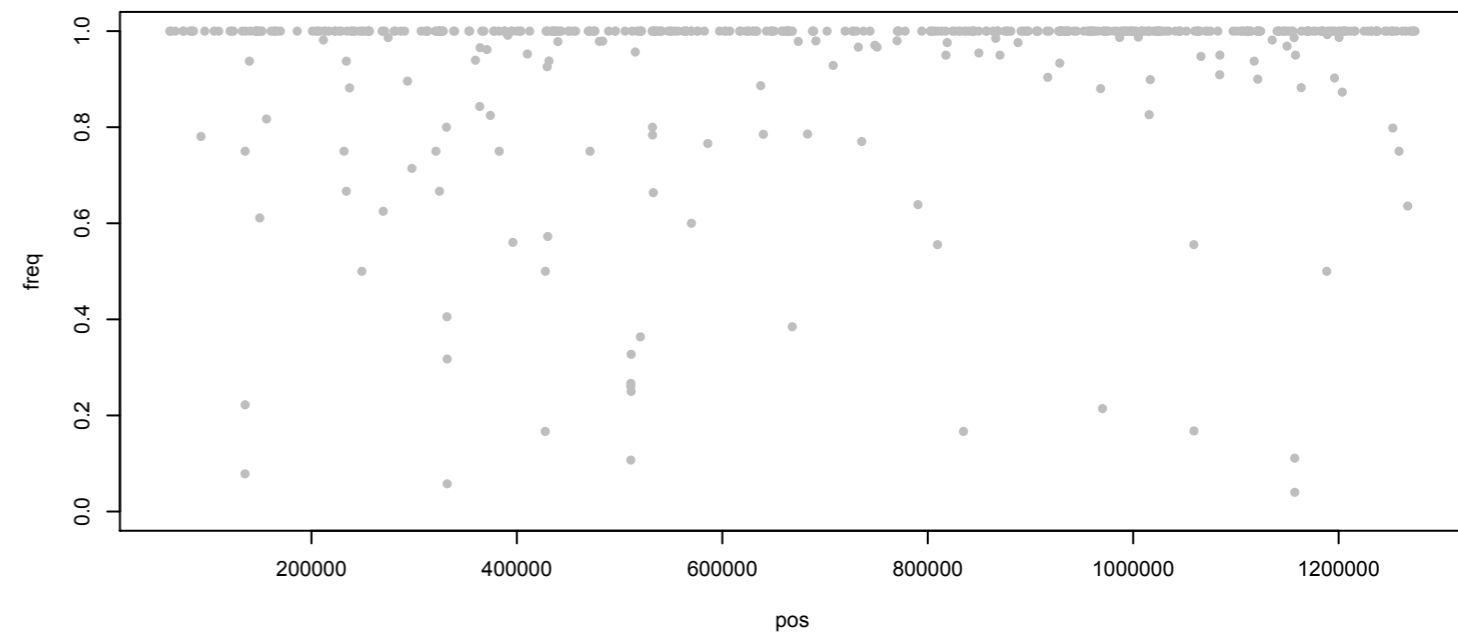

Supplement: pgen.1002487.s001.pdf [file pgen.1002487.s001.pdf]
